# Supplementary material for: The Role of HOX Genes as Potential Biomarkers in Colorectal Cancer: A Systematic Review
Source: Research Square preprint supplement (doi:10.21203/rs.3.rs-618476/v3), 2021-10-11
Supplement: Supplementary file 1 [file 7b0483f71c44ff79a19bd25a.docx]

**SEARCH STRATEGY ALGORITHMS**

**Strategy for Pubmed** (field labels were used to restrict specific terms/phrases to Medical Subject Headings [MeSH] or by publication type [pt] and title/abstract [tiab] fields) No limitations were used.

1. "genes, homeobox"[MeSH Terms] OR "Hox"[tiab] OR "homeobox"[tiab] OR "Homeoboxes"[tiab] OR "Homeo Box"[tiab] OR "Homeo Boxes"[tiab] OR "Homeotic"[tiab]
2. "colon"[MeSH Terms] OR "colon"[tiab] OR "colorectal"[tiab] OR "rectal"[tiab] OR "rectum"[MeSH Terms] OR "rectum"[tiab] OR "gastrointestinal"[tiab] OR "colonic"[tiab] OR "intestinal"[tiab] OR "intestine"[tiab] OR "intestines"[MeSH Terms] OR "intestines"[tiab] OR "bowel"[tiab] OR "digestive system"[MeSH Terms] OR "digestive"[tiab] OR "cecum"[MeSH Terms] OR "cecum"[tiab] OR "caecum"[tiab] OR "cecal"[tiab] OR "caecal"[tiab] OR "anal canal"[MeSH Terms] OR "anal"[tiab] OR "anus"[tiab] OR "colon, sigmoid"[MeSH Terms] OR "sigmoid"[tiab] OR "rectosigmoid"[tiab]
3. "neoplasms"[MeSH] OR "neoplasms"[tiab] OR "neoplasm"[tiab] OR "cancer"[tiab] OR "cancers"[tiab] OR "tumour"[tiab] OR "tumours"[tiab] OR "tumor"[tiab] OR "tumors"[tiab] OR "neoplasia"[tiab] OR "malignancy"[tiab] OR "malignancies"[tiab] OR "malignant"[tiab] OR "carcinoma"[MeSH Terms] OR "carcinoma"[tiab] OR "carcinomas"[tiab] OR "neoplastic"[tiab]
4. "editorial"[pt] OR "letter"[pt] OR "correspondence as topic"[MeSH Terms] OR "review"[pt] OR "review literature as topic"[MeSH Terms]

Final search for research questions: #1 AND #2 AND #3 NOT #4

**Strategy for Embase** (field labels were used to restrict specific terms/phrases by publication type and title/abstract/keyword [ti,ab,kw] fields). No limitations were used.

1. "Hox":ti,ab,kw OR "homeobox":ti,ab,kw OR "Homeoboxes":ti,ab,kw OR "Homeo Box":ti,ab,kw OR "Homeo Boxes":ti,ab,kw OR "Homeotic":ti,ab,kw
2. "colon":ti,ab,kw OR "colorectal":ti,ab,kw OR "rectal":ti,ab,kw OR "rectum":ti,ab,kw OR "gastrointestinal":ti,ab,kw OR "colonic":ti,ab,kw OR "intestinal":ti,ab,kw OR "intestine":ti,ab,kw OR "intestines":ti,ab,kw OR "intestines":ti,ab,kw OR "bowel":ti,ab,kw OR "digestive system":ti,ab,kw OR "digestive":ti,ab,kw OR "cecum":ti,ab,kw OR "caecum":ti,ab,kw OR "cecal":ti,ab,kw OR "caecal":ti,ab,kw OR "anal":ti,ab,kw OR "anus":ti,ab,kw OR "sigmoid":ti,ab,kw OR "rectosigmoid":ti,ab,kw
3. "neoplasms":ti,ab,kw OR "neoplasm":ti,ab,kw OR "cancer":ti,ab,kw OR "cancers":ti,ab,kw OR "tumour":ti,ab,kw OR "tumours":ti,ab,kw OR "tumor":ti,ab,kw OR "tumors":ti,ab,kw OR "neoplasia":ti,ab,kw OR "malignancy":ti,ab,kw OR "malignancies":ti,ab,kw OR "malignant":ti,ab,kw OR "carcinoma":ti,ab,kw OR "carcinomas":ti,ab,kw OR "neoplastic":ti,ab,kw
4. "editorial":ti,ab,kw OR "letter":ti,ab,kw OR "correspondence":ti,ab,kw OR "review":ti,ab,kw

Final search for research questions: #1 AND #2 AND #3 NOT #4

**Strategy for Web of Sciences** (All terms were searched in “Topic”). No limitations were used.

1. "Hox" OR "homeobox" OR "Homeoboxes" OR "Homeo Box" OR "Homeo Boxes" OR "Homeotic"
2. "colon" OR "colorectal" OR "rectal" OR "rectum" OR "gastrointestinal" OR "colonic" OR "intestinal" OR "intestine" OR "intestines" OR "intestines" OR "bowel" OR "digestive system" OR "digestive" OR "cecum" OR "caecum" OR "cecal" OR "caecal" OR "anal" OR "anus" OR "sigmoid" OR "rectosigmoid"
3. "neoplasms" OR "neoplasm" OR "cancer" OR "cancers" OR "tumour" OR "tumours" OR "tumor" OR "tumors" OR "neoplasia" OR "malignancy" OR "malignancies" OR "malignant" OR "carcinoma" OR "carcinomas" OR "neoplastic"
4. "editorial":pt OR "letter":pt OR "correspondence":pt OR "review":pt

Final search for research questions: #1 AND #2 AND #3 NOT #4

**Strategy for Cochrane Library**

Default search fields (Title, Abstract, Keywords) was used for #1, #2, #3.

Publication type fields was used for #4

No limitations were used.

1. MeSH descriptor: [Genes, Homeobox] explode all trees
2. MeSH descriptor: [Colonic Neoplasms] explode all trees
3. MeSH descriptor: [Rectal Neoplasms] explode all trees
4. MeSH descriptor: [Sigmoid Neoplasms] explode all trees
5. MeSH descriptor: [Colorectal Neoplasms] explode all trees
6. MeSH descriptor: [Intestinal Neoplasms] explode all trees
7. "Hox" OR "homeobox" OR "Homeoboxes" OR "Homeo Box" OR "Homeo Boxes" OR "Homeotic"
8. "colon" OR "colorectal" OR "rectal" OR "rectum" OR "gastrointestinal" OR "colonic" OR "intestinal" OR "intestine" OR "intestines" OR "intestines" OR "bowel" OR "digestive system" OR "digestive" OR "cecum" OR "caecum" OR "cecal" OR "caecal" OR "anal" OR "anus" OR "sigmoid" OR "rectosigmoid"
9. "neoplasms" OR "neoplasm" OR "cancer" OR "cancers" OR "tumour" OR "tumours" OR "tumor" OR "tumors" OR "neoplasia" OR "malignancy" OR "malignancies" OR "malignant" OR "carcinoma" OR "carcinomas" OR "neoplastic"
10. #1 OR #7
11. #2 OR #3 OR #4 OR #5 OR #6
12. #8 AND #9
13. #11 OR #12
14. Final search for research questions: #10 AND #13
